# Supplementary material for: Optimization of industrial (3000 L) production of Bacillus subtilis CW-S and its novel application for minituber and industrial-grade potato cultivation
Source: PubMed Central journal article supplement (PMC9249890; doi:10.1038/s41598-022-15366-5), 2022-07-01
Supplement: 41598_2022_15366_MOESM1_ESM.pdf [file 41598_2022_15366_MOESM1_ESM.pdf]

## Optimization of industrial (3000L) production of *Bacillus subtilis* CW-S and its novel application for minituber and industrial-grade potato cultivation

Md. Abuhena<sup>1†</sup>, Jubair Al-Rashid<sup>1,2†</sup>, Md. Faisal Azim<sup>\*1†</sup>, Md. Niuz Morshed Khan<sup>2</sup>, Md. Golam Kabir<sup>1,2</sup>, Nirmal Chandra Barman<sup>2</sup>, Noorain Munim Rasul<sup>1,2</sup>, Shahina Akter<sup>\*3</sup> and Md. Amdadul Huq<sup>\*4</sup>

### Supplementary dataset

| Biochemical Test              | Result | Remarks                                                                                                                                                                                                                                |
|-------------------------------|--------|----------------------------------------------------------------------------------------------------------------------------------------------------------------------------------------------------------------------------------------|
| Shape                         | Rod    | Microscopic Observation                                                                                                                                                                                                                |
| Gram staining                 | +      | Microscopic Observation                                                                                                                                                                                                                |
| Starch hydrolysis             | +      | To test for amylase producing capabilities                                                                                                                                                                                             |
| Spore formation               | +      | Microscopic Observation                                                                                                                                                                                                                |
| Catalase                      | +      | key biochemical test for bacillus group                                                                                                                                                                                                |
| VP                            | +      | ok                                                                                                                                                                                                                                     |
| MR                            | -      | ok                                                                                                                                                                                                                                     |
| Citrate                       | +      | ok                                                                                                                                                                                                                                     |
| Indole                        | +      | ok                                                                                                                                                                                                                                     |
| 7 % NaCl growth               | +      | Growth observed                                                                                                                                                                                                                        |
| Growth in Nitrogen free media | +      | Growth observed                                                                                                                                                                                                                        |
| Growth at 45-50°C temperature | +      | Growth observed                                                                                                                                                                                                                        |
| Bacillus differentiation agar | +      | To test for mannitol fermentation abilities.<br><i>Bacillus subtilis</i> group develops yellow color on the purple colored agar medium.<br>Bromocresol purple is used in this media as a pH indicator to detect mannitol fermentation. |

**Supplementary Table T1.** Biochemical tests for primary identification (identification flow chart of Bergey's manual of determinative bacteriology was followed for biochemical tests)

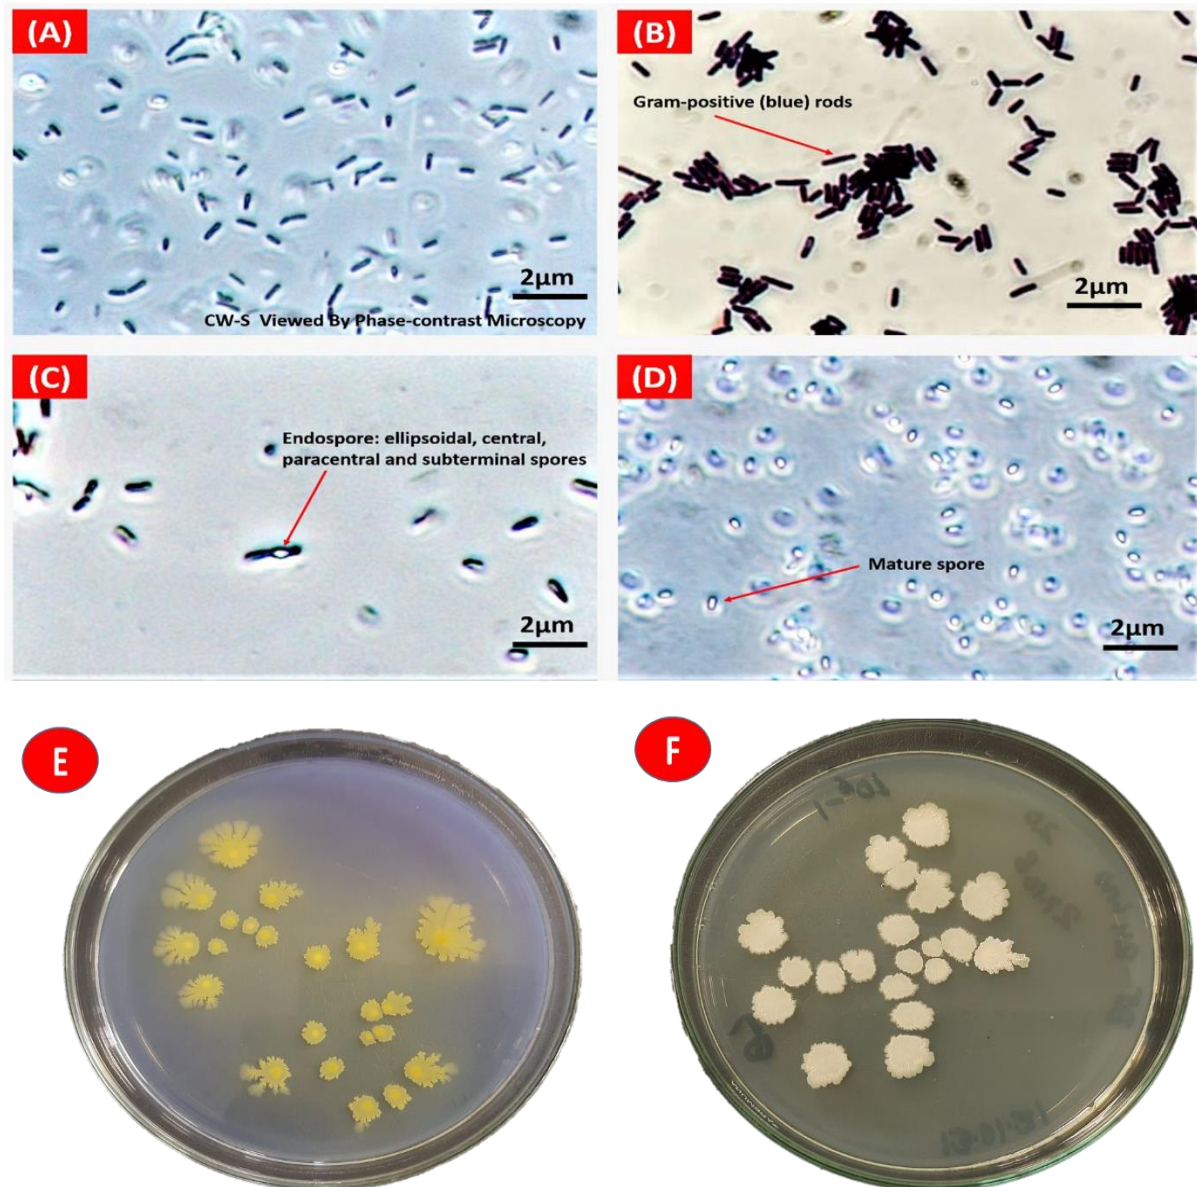

**Supplementary Fig. F1.** **A)** Shape of the CW-S cell under a phase-contrast microscope (Axio Imager A1, Carl Zeiss, Germany). **B)** The shape, arrangement, and gram reaction of a bacterial culture in a smear stained with the Gram Stain protocol demonstrate gram-positive results. **C)** *Bacillus subtilis*: ellipsoidal, central, paracentral and subterminal spores, not swelling the sporangia. **D)** Mother cell lyses and releases the mature spore at the end of fermentation cycle. **E)** Colony on differential media. **F)** Colony on QC plate.

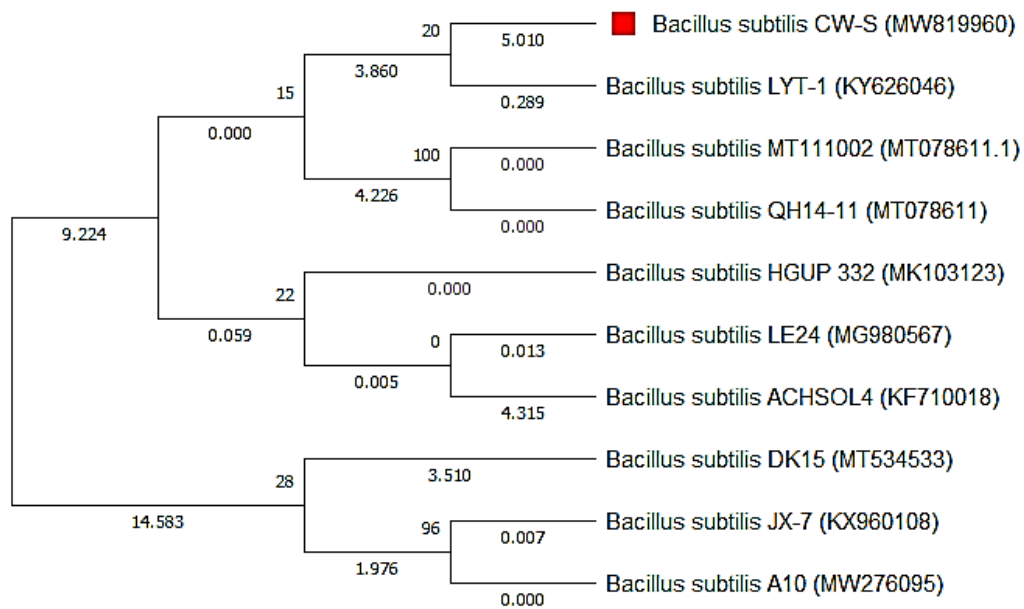

**Supplementary Fig. F2.** The evolutionary history was inferred by using the Maximum Likelihood method and Tamura-Nei model

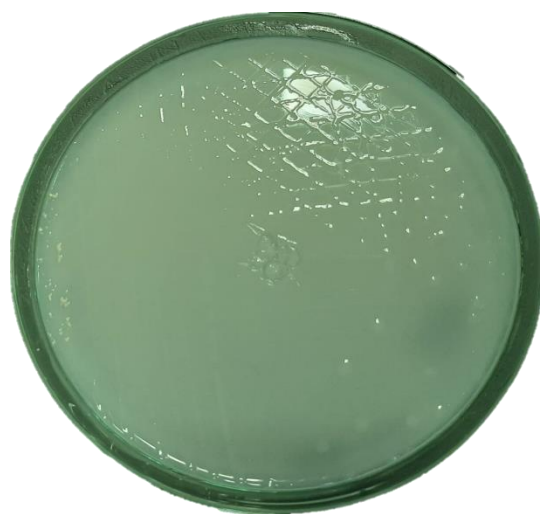

**Supplemental Fig. F3.** CW-S colony growth on nitrogen-free media

| Run                                   | Space type | Factor 1      | Factor 2          | Factor 3 | Factor 4    | Response                    |
|---------------------------------------|------------|---------------|-------------------|----------|-------------|-----------------------------|
|                                       |            | A:Temperature | B:Incubation Time | C:pH     | D:Agitation | Y:CFU/mL (10 <sup>8</sup> ) |
| 1                                     | Factorial  | -1            | -1                | 1        | -1          | 6.06 ± 0.18                 |
| 2                                     | Factorial  | 1             | -1                | -1       | 1           | 7.10 ± 0.11                 |
| 3                                     | Factorial  | -1            | 1                 | 1        | 1           | 6.16 ± 0.04                 |
| 4                                     | Factorial  | -1            | 1                 | -1       | -1          | 7.56 ± 0.08                 |
| 5                                     | Factorial  | -1            | -1                | -1       | 1           | 6.64 ± 0.13                 |
| 6                                     | Factorial  | 1             | -1                | -1       | -1          | 6.32 ± 0.09                 |
| 7                                     | Axial      | 0             | -2                | 0        | 0           | 8.51 ± 0.07                 |
| 8                                     | Axial      | 0             | 0                 | 0        | -2          | 5.95 ± 0.12                 |
| 9                                     | Center     | 0             | 0                 | 0        | 0           | 9.89 ± 0.03                 |
| 10                                    | Center     | 0             | 0                 | 0        | 0           | 9.84 ± 0.17                 |
| 11                                    | Factorial  | 1             | 1                 | 1        | 1           | 6.21 ± 0.06                 |
| 12                                    | Axial      | 0             | 0                 | -2       | 0           | 8.34 ± 0.11                 |
| 13                                    | Factorial  | 1             | 1                 | 1        | -1          | 5.95 ± 0.05                 |
| 14                                    | Factorial  | -1            | 1                 | 1        | -1          | 6.87 ± 0.02                 |
| 15                                    | Factorial  | 1             | 1                 | -1       | -1          | 6.81 ± 0.08                 |
| 16                                    | Center     | 0             | 0                 | 0        | 0           | 9.75 ± 0.11                 |
| 17                                    | Axial      | 0             | 0                 | 2        | 0           | 7.31 ± 0.10                 |
| 18                                    | Axial      | -0            | 0                 | 0        | 0           | 3.74 ± 0.13                 |
| 19                                    | Factorial  | -1            | 1                 | -1       | 1           | 6.03 ± 0.05                 |
| 20                                    | Center     | 0             | 0                 | 0        | 0           | 9.66 ± 0.19                 |
| 21                                    | Axial      | 2             | 0                 | 0        | 0           | 3.18 ± 0.05                 |
| 22                                    | Axial      | 0             | 0                 | 0        | 2           | 5.64 ± 0.14                 |
| 23                                    | Center     | 0             | 0                 | 0        | 0           | 9.81 ± 0.17                 |
| 24                                    | Factorial  | 1             | -1                | 1        | -1          | 5.14 ± 0.15                 |
| 25                                    | Factorial  | -1            | -1                | 1        | 1           | 6.14 ± 0.09                 |
| 26                                    | Factorial  | 1             | 1                 | -1       | 1           | 6.69 ± 0.05                 |
| 27                                    | Axial      | 0             | -2                | 0        | 0           | 8.90 ± 0.11                 |
| 28                                    | Factorial  | -1            | -1                | -1       | -1          | 7.20 ± 0.03                 |
| 29                                    | Factorial  | 1             | -1                | 1        | 1           | 6.01 ± 0.11                 |
| 30                                    | Center     | 0             | 0                 | 0        | 0           | 9.70 ± 0.16                 |
| Within columns, CFU ± SD values (n=3) |            |               |                   |          |             |                             |

**Supplementary Table T2.** Observed response of CCD using four independent variables and six centre points.

| Source                                                                                     | Std. Dev.     | R <sup>2</sup> | Adjusted R <sup>2</sup> | Predicted R <sup>2</sup> | PRESS         |                  |
|--------------------------------------------------------------------------------------------|---------------|----------------|-------------------------|--------------------------|---------------|------------------|
| Linear                                                                                     | 1.89          | 0.0374         | -0.1166                 | -0.2758                  | 117.90        |                  |
| 2FI                                                                                        | 2.13          | 0.0652         | -0.4269                 | -0.5484                  | 143.10        |                  |
| <b>Quadratic</b>                                                                           | <b>0.1105</b> | <b>0.9980</b>  | <b>0.9962</b>           | <b>0.9904</b>            | <b>0.8898</b> | <b>Suggested</b> |
| Cubic                                                                                      | 0.0758        | 0.9996         | 0.9982                  | 0.9962                   | 0.3513        | Aliased          |
| Focus on the model maximizing the Adjusted R <sup>2</sup> and the Predicted R <sup>2</sup> |               |                |                         |                          |               |                  |

**Supplementary Table T3.** Model (CCD) summary statistics

| Source                                                    | Sum of Squares | df        | Mean Square   | F-value     | p-value       |                  |
|-----------------------------------------------------------|----------------|-----------|---------------|-------------|---------------|------------------|
| Linear                                                    | 88.92          | 20        | 4.45          | 582.70      | < 0.0001      |                  |
| 2FI                                                       | 86.35          | 14        | 6.17          | 808.41      | < 0.0001      |                  |
| <b>Quadratic</b>                                          | <b>0.1449</b>  | <b>10</b> | <b>0.0145</b> | <b>1.90</b> | <b>0.2481</b> | <b>Suggested</b> |
| Cubic                                                     | 0.0021         | 2         | 0.0010        | 0.1349      | 0.8769        | Aliased          |
| Pure Error                                                | 0.0382         | 5         | 0.0076        |             |               |                  |
| The selected model should have insignificant lack-of-fit. |                |           |               |             |               |                  |

**Supplementary Table T4.** Lack of Fit Tests.

| Run Order | Actual Value | Predicted Value | Residual | Leverage | Internally Studentized Residuals | Externally Studentized Residuals | Cook's Distance | Influence on Fitted Value DFFITS | Standard Order |
|-----------|--------------|-----------------|----------|----------|----------------------------------|----------------------------------|-----------------|----------------------------------|----------------|
| 1         | 6.06         | 6.17            | -0.1096  | 0.583    | -1.537                           | -1.617                           | 0.220           | -1.914                           | 5              |
| 2         | 7.10         | 7.00            | 0.1033   | 0.583    | 1.449                            | 1.509                            | 0.196           | 1.786                            | 10             |
| 3         | 6.16         | 6.11            | 0.0504   | 0.583    | 0.707                            | 0.695                            | 0.047           | 0.822                            | 15             |
| 4         | 7.56         | 7.44            | 0.1204   | 0.583    | 1.689                            | 1.813                            | 0.266           | 2.145 <sup>(D)</sup>             | 3              |
| 5         | 6.64         | 6.62            | 0.0237   | 0.583    | 0.333                            | 0.323                            | 0.010           | 0.382                            | 9              |
| 6         | 6.32         | 6.39            | -0.0746  | 0.583    | -1.046                           | -1.049                           | 0.102           | -1.242                           | 2              |
| 7         | 8.51         | 8.49            | 0.0196   | 0.583    | 0.275                            | 0.266                            | 0.007           | 0.315                            | 19             |
| 8         | 5.95         | 5.91            | 0.0362   | 0.583    | 0.508                            | 0.495                            | 0.024           | 0.586                            | 23             |
| 9         | 9.89         | 9.78            | 0.1150   | 0.167    | 1.140                            | 1.153                            | 0.017           | 0.515                            | 28             |
| 10        | 9.84         | 9.78            | 0.0650   | 0.167    | 0.644                            | 0.631                            | 0.006           | 0.282                            | 27             |
| 11        | 6.21         | 6.27            | -0.0550  | 0.583    | -0.771                           | -0.760                           | 0.056           | -0.900                           | 16             |
| 12        | 8.34         | 8.47            | -0.1304  | 0.583    | -1.829                           | -2.004                           | 0.312           | -<br>2.371 <sup>(D)</sup>        | 21             |
| 13        | 5.95         | 6.00            | -0.0479  | 0.583    | -0.672                           | -0.659                           | 0.042           | -0.780                           | 8              |
| 14        | 6.87         | 6.97            | -0.1000  | 0.583    | -1.402                           | -1.453                           | 0.184           | -1.720                           | 7              |
| 15        | 6.81         | 6.82            | -0.0100  | 0.583    | -0.140                           | -0.136                           | 0.002           | -0.160                           | 4              |
| 16        | 9.75         | 9.78            | -0.0250  | 0.167    | -0.248                           | -0.240                           | 0.001           | -0.107                           | 26             |
| 17        | 7.31         | 7.16            | 0.1513   | 0.583    | 2.121                            | 2.449                            | 0.420           | 2.897 <sup>(D)</sup>             | 22             |
| 18        | 3.74         | 3.75            | -0.0054  | 0.583    | -0.076                           | -0.073                           | 0.001           | -0.087                           | 17             |
| 19        | 6.03         | 6.10            | -0.0667  | 0.583    | -0.935                           | -0.931                           | 0.082           | -1.101                           | 11             |
| 20        | 9.66         | 9.78            | -0.1150  | 0.167    | -1.140                           | -1.153                           | 0.017           | -0.515                           | 30             |
| 21        | 3.18         | 3.15            | 0.0262   | 0.583    | 0.368                            | 0.357                            | 0.013           | 0.423                            | 18             |
| 22        | 5.64         | 5.66            | -0.0154  | 0.583    | -0.216                           | -0.209                           | 0.004           | -0.247                           | 24             |
| 23        | 9.81         | 9.78            | 0.0350   | 0.167    | 0.347                            | 0.337                            | 0.002           | 0.151                            | 25             |
| 24        | 5.14         | 5.07            | 0.0700   | 0.583    | 0.982                            | 0.980                            | 0.090           | 1.160                            | 6              |
| 25        | 6.14         | 6.13            | 0.0133   | 0.583    | 0.187                            | 0.181                            | 0.003           | 0.214                            | 13             |
| 26        | 6.69         | 6.60            | 0.0854   | 0.583    | 1.198                            | 1.217                            | 0.134           | 1.440                            | 12             |
| 27        | 8.90         | 8.90            | 0.0013   | 0.583    | 0.018                            | 0.017                            | 0.000           | 0.020                            | 20             |
| 28        | 7.20         | 7.14            | 0.0583   | 0.583    | 0.818                            | 0.808                            | 0.062           | 0.957                            | 1              |
| 29        | 6.01         | 6.15            | -0.1446  | 0.583    | -2.027                           | -2.299                           | 0.384           | -<br>2.720 <sup>(D)</sup>        | 14             |
| 30        | 9.70         | 9.78            | -0.0750  | 0.167    | -0.744                           | -0.732                           | 0.007           | -0.327                           | 29             |

<sup>(D)</sup> Exceeds

limits.

**Supplementary Table T5.** Actual and Predicted Value of CCD

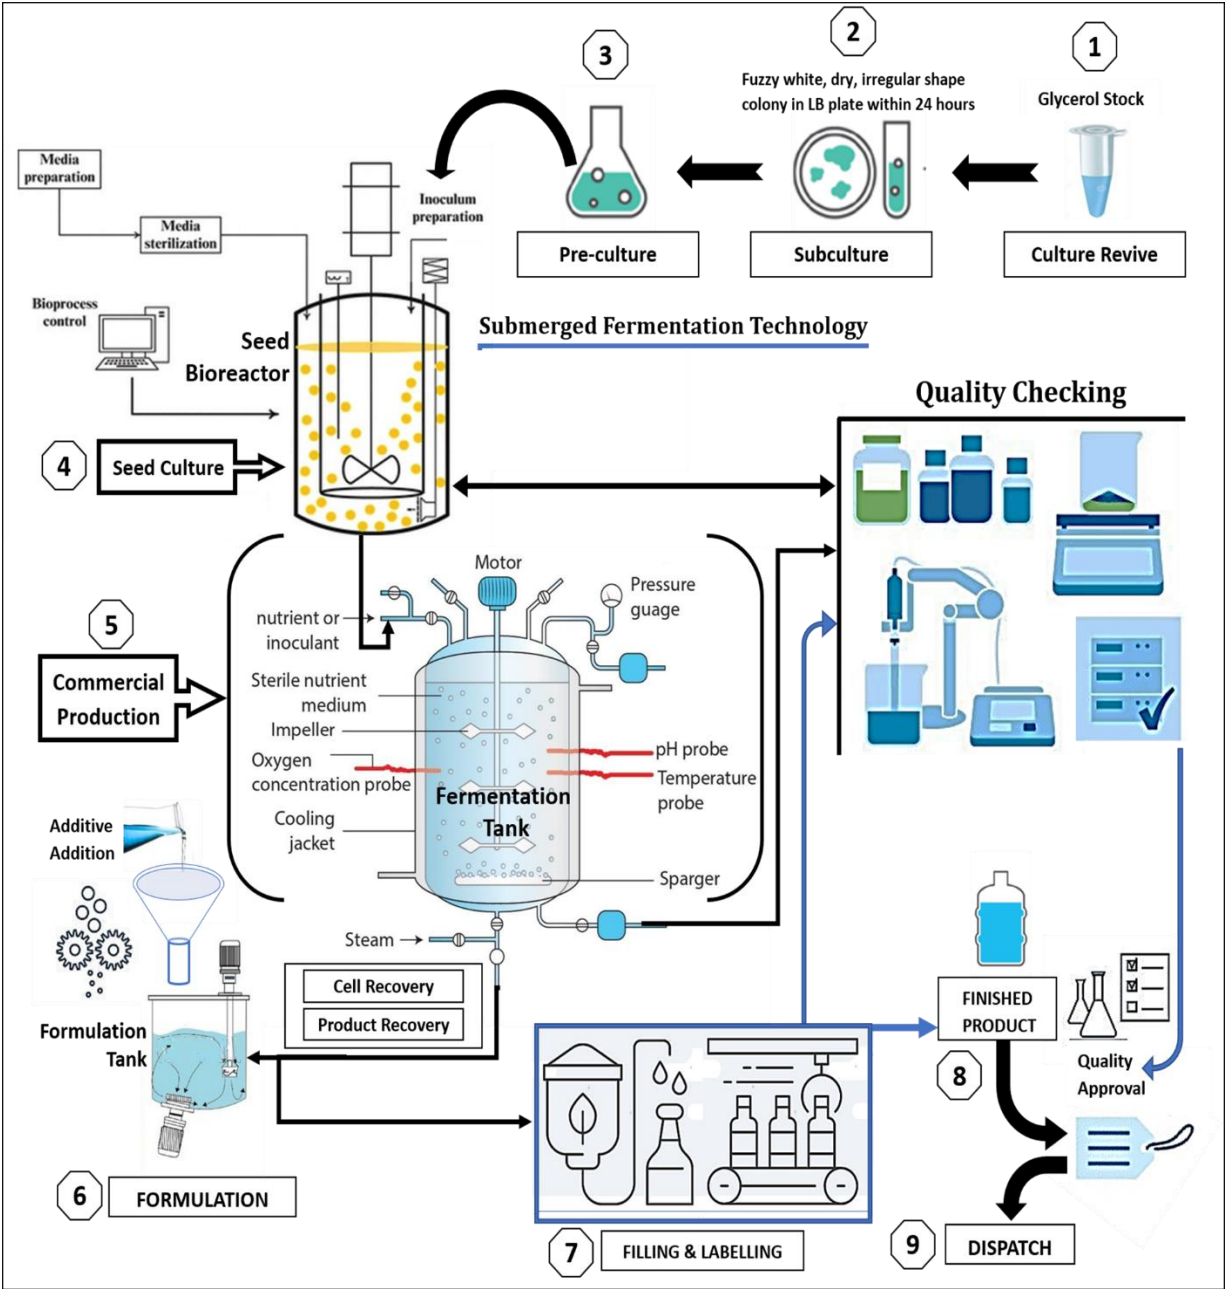

**Supplementary Fig. F4.** Industrial production process flow diagram of CW-S.

| Month | Control :<br>CFU/mL (10 <sup>9</sup> ) | Formulated:<br>CFU/mL (10 <sup>9</sup> ) | Control:<br>pH | Formulated:<br>pH |
|-------|----------------------------------------|------------------------------------------|----------------|-------------------|
| 0     | 2.010±0.0400a                          | 1.97±0.040a                              | 6.93±0.04a     | 6.86±0.057a       |
| 1     | 0.789±0.0355b                          | 1.93±0.060a                              | 6.55±0.20ab    | 6.79±0.057a       |
| 2     | 0.28±0.0488c                           | 1.45±0.080b                              | 6.19±0.11bc    | 6.47±0.047bc      |
| 3     | 0.125±0.0175d                          | 0.795±0.013c                             | 6.03±0.03cd    | 6.44±0.085c       |
| 4     | 0.0435±0.0035e                         | 0.51±0.020d                              | 5.70±0.09d     | 6.51±0.071bc      |
| 5     | 0.00078±6.03E-05 e                     | 0.44±0.052d                              | 5.16±0.05e     | 6.71±0.165ab      |
| 6     | 3.23E-06±5.51E-07e                     | 0.38±0.029d                              | 4.57±0.31f     | 6.66±0.057abc     |

\* Within columns, mean ± SD values with a shared letter do not differ significantly (P < 0.05), according to Tukey multiple comparisons of means test (n=3)

**Supplementary Table T6.** Cell concentration (CFU/mL) viability and pH variability of control and formulated CW-S with time interval.

| Nutrient adding | Initial cell concentration of CW-S<br>(CFU/mL) after mixing with<br>nutrient solution | Cell concentration of CW-S<br>(CFU/mL) at seventh days |
|-----------------|---------------------------------------------------------------------------------------|--------------------------------------------------------|
| cycle1          | 2.56±0.07×10 <sup>6</sup>                                                             | 5.62±0.12×10 <sup>3</sup>                              |
| cycle2          | 2.18±0.05×10 <sup>6</sup>                                                             | 3.88±0.09×10 <sup>4</sup>                              |
| cycle3          | 2.68±0.13×10 <sup>6</sup>                                                             | 4.16±0.05×10 <sup>4</sup>                              |
| cycle4          | 1.57±0.14×10 <sup>6</sup>                                                             | 5.19±0.17×10 <sup>3</sup>                              |
| cycle5          | 3.84±0.09×10 <sup>6</sup>                                                             | 8.54±0.13×10 <sup>3</sup>                              |
| cycle6          | 2.55±0.16×10 <sup>6</sup>                                                             | 2.98±0.02×10 <sup>4</sup>                              |
| cycle7          | 3.16±0.11×10 <sup>6</sup>                                                             | 6.24±0.04×10 <sup>4</sup>                              |
| cycle8          | 2.33±0.02×10 <sup>6</sup>                                                             | 1.28±0.18×10 <sup>4</sup>                              |
| cycle9          | 1.98±0.08×10 <sup>6</sup>                                                             | 5.84±0.24×10 <sup>4</sup>                              |
| cycle10         | 2.64±0.03×10 <sup>6</sup>                                                             | 3.42±0.17×10 <sup>4</sup>                              |



|                                |                             |                             |
|--------------------------------|-----------------------------|-----------------------------|
| cycle11                        | $3.12 \pm 0.03 \times 10^6$ | $6.57 \pm 0.34 \times 10^4$ |
| CFU mean $\pm$ SD values (n=3) |                             |                             |

**Supplementary Table T7.** Cell concentration of CW-S in nutrient solution of aeroponic

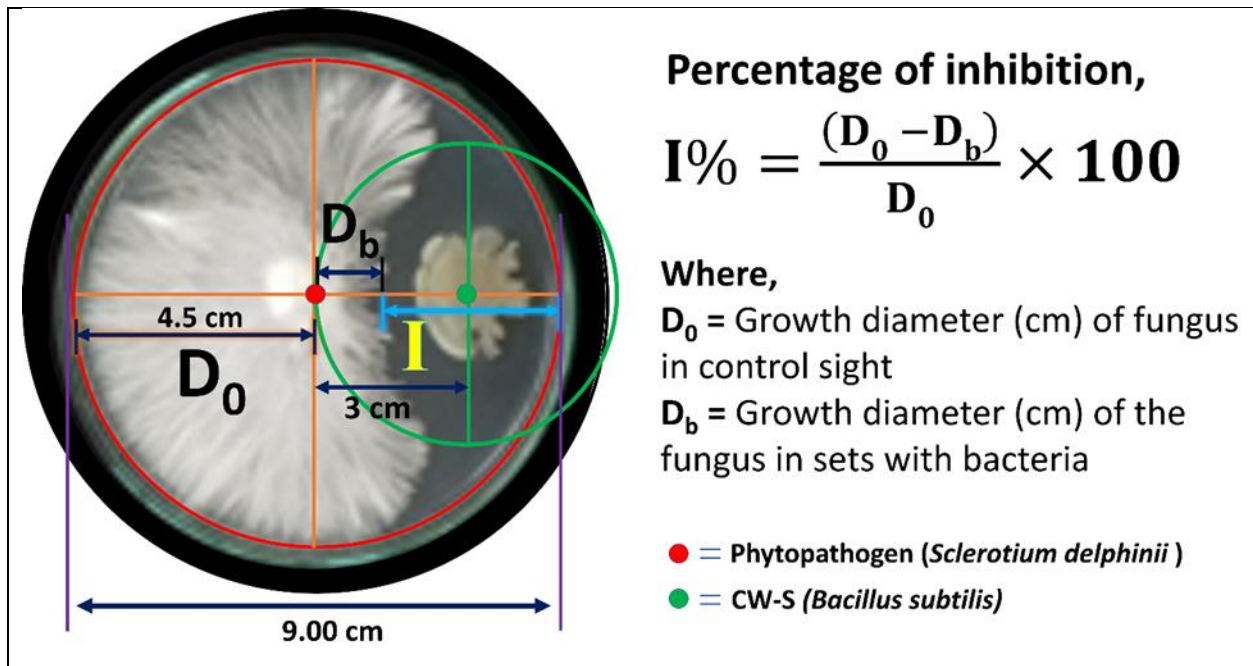

**Supplementary Fig. F5.** Schematic representation of inhibition percentage. The biocontrol activity assay was carried out in petri plates (9 cm in diameter) with ten replications, and the results were expressed as the mean of these values.

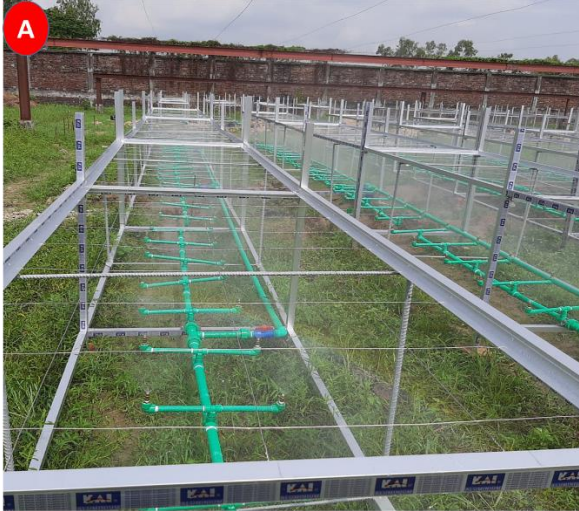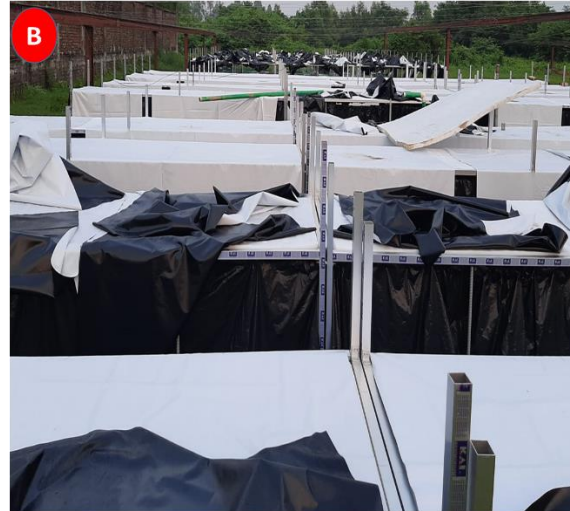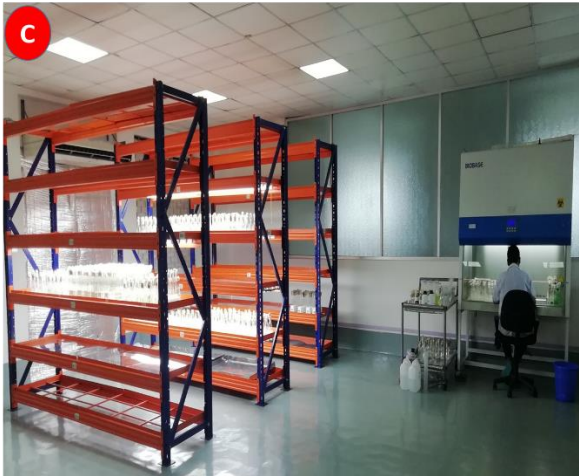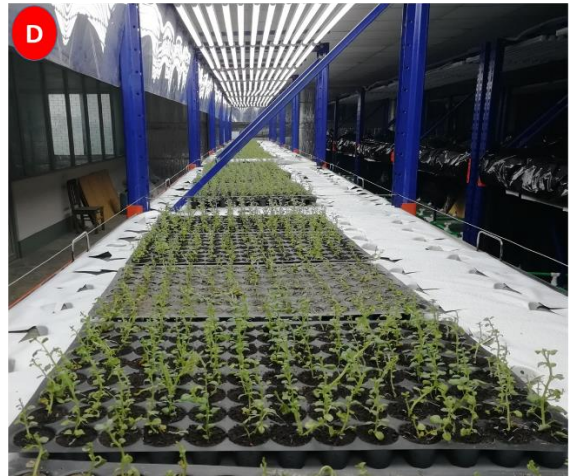

**Supplementary Fig. F6.** A&B) Aerobic rack installation. C) Tissue culture plantlets production. D) Hardening of plantlets.

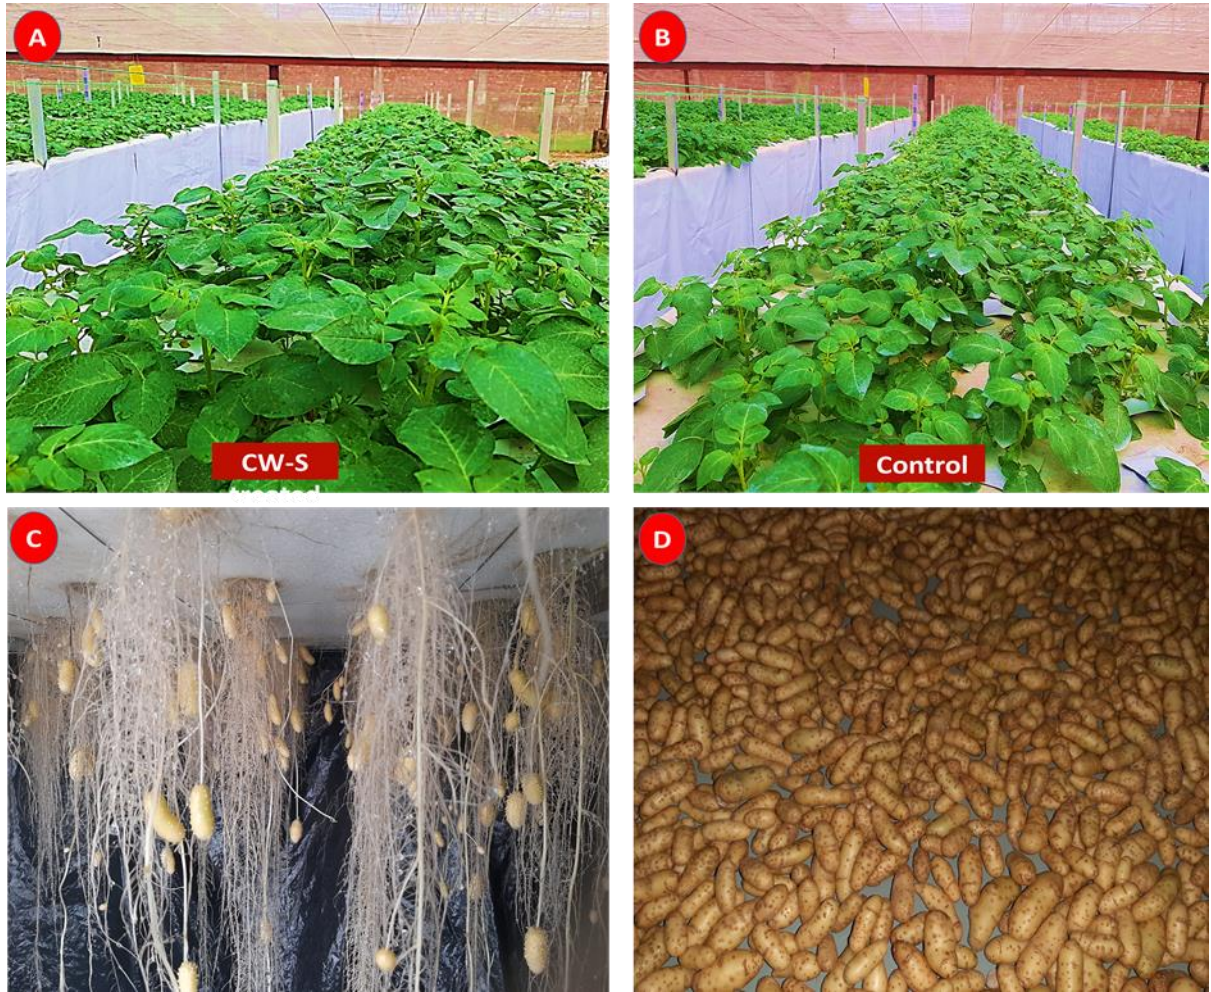

**Supplementary Fig. F7.** A) Growth of treated plantlets in aeroponic. B) Growth of control plantlets in aeroponic. . C) Minituber initiation. D) Harvested minituber.

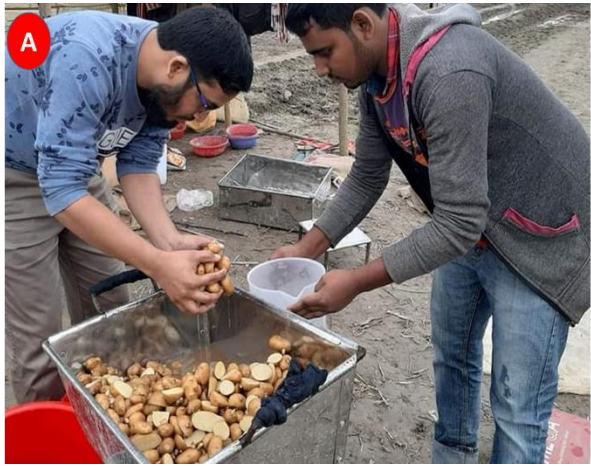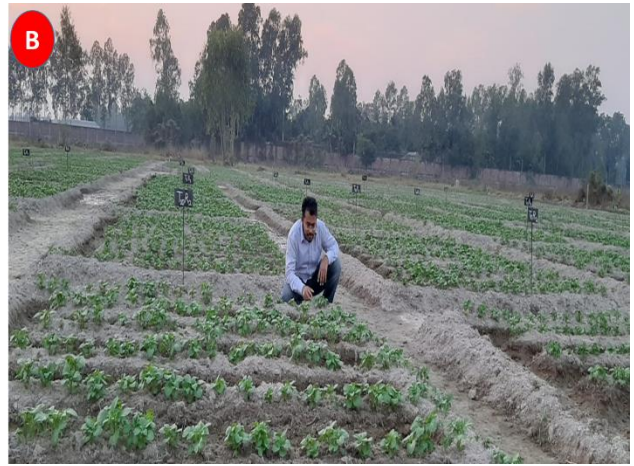

**Supplementary Fig. F8.** A) In a field trial, tuber treatment with CW-S. B) Field condition after 15 days of germination.

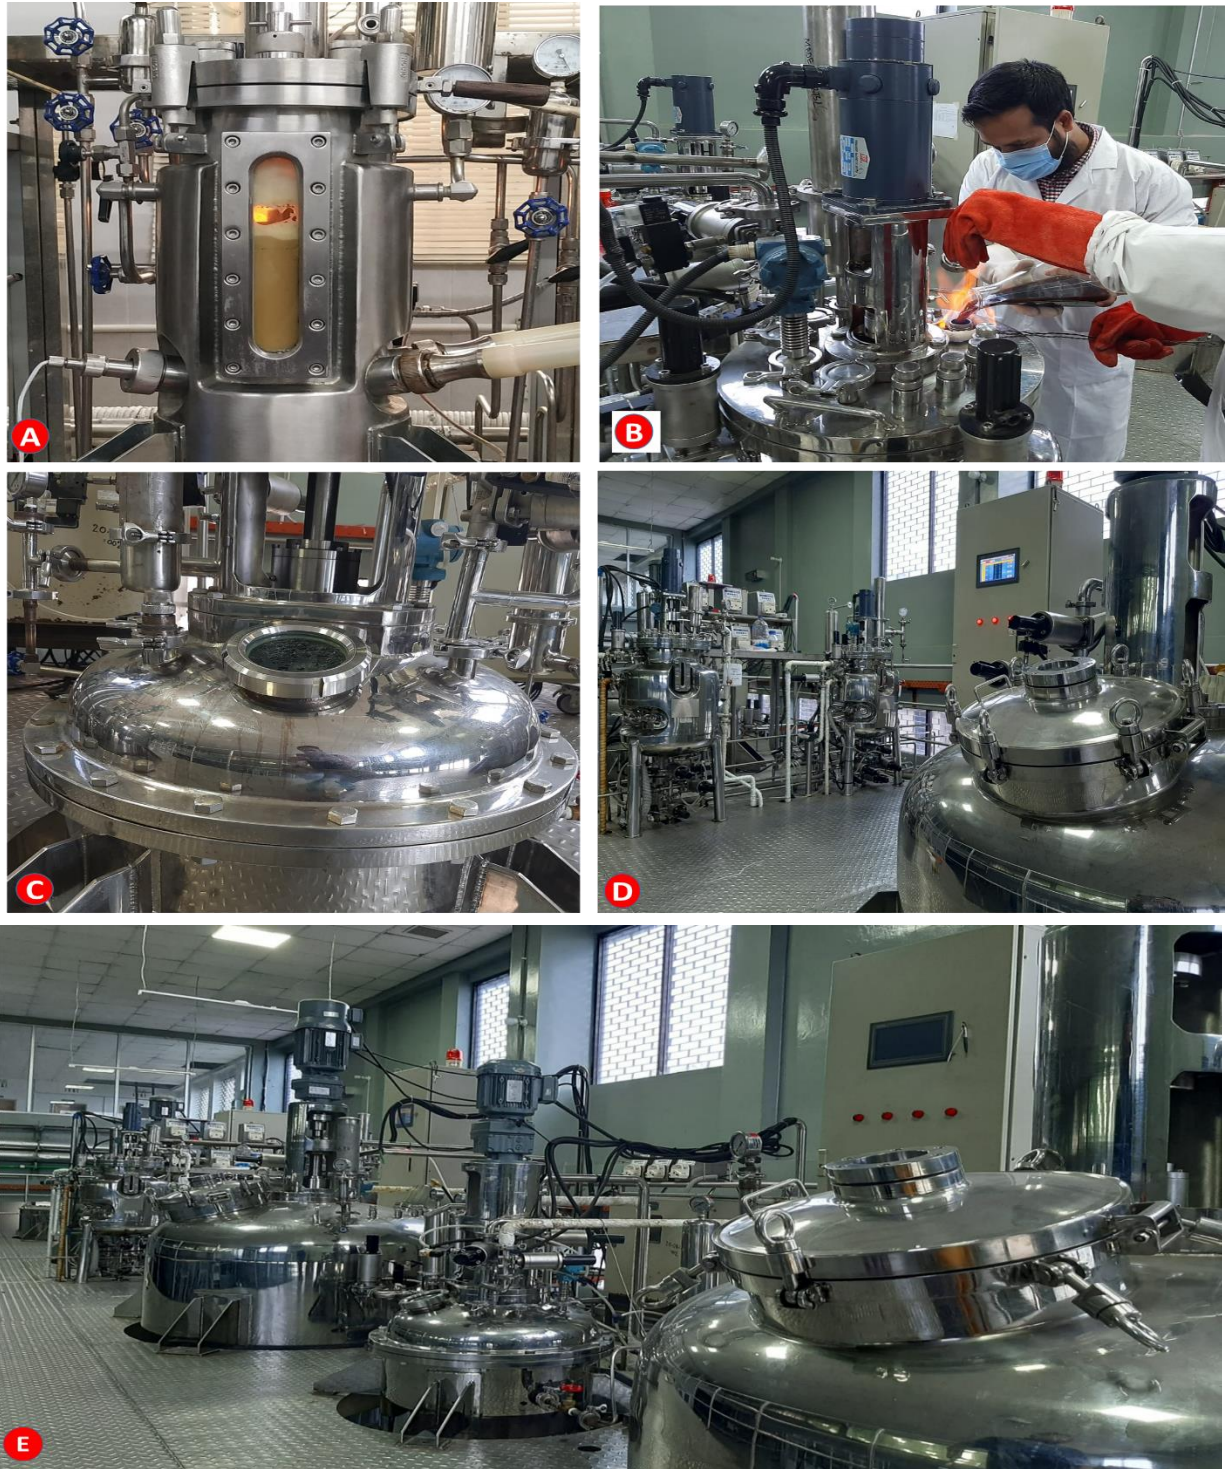

**Supplementary Fig. F9:** A) Laboratory Bioreactor: 10L. B) Seed culture vessel: 30L. C) Pilot Bioreactor: 300L. D. Industrial Bioreactor: 3000L. E) Fermentation floor.
